# Supplementary material for: Germanium-based multiphase material as a high-capacity and cycle-stable anode for lithium-ion batteries
Source: Royal Society of Chemistry journal article supplement (doi:10.1039/c6ra19811b), 2016-01-01
Supplement: c6ra19811b1.pdf [file c6ra19811b1.pdf]

**Supplementary Information**

**Germanium-based multiphase material as a high-capacity and  
cycle-stable anode for lithium-ion batteries**

Dohyoung Kwon<sup>a,†</sup>, Sinho Choi<sup>a,b,†</sup>, Guoxiu Wang<sup>b</sup> and Soojin Park<sup>a\*</sup>

*<sup>a</sup> Department of Energy Engineering, School of Energy and Chemical Engineering*

*Ulsan National Institute of Science and Technology (UNIST), Ulsan 44919, South Korea*

*<sup>b</sup> School of Mathematical and Physical Sciences, Faculty of Science, University of  
Technology Sydney, NSW 2007, Australia*

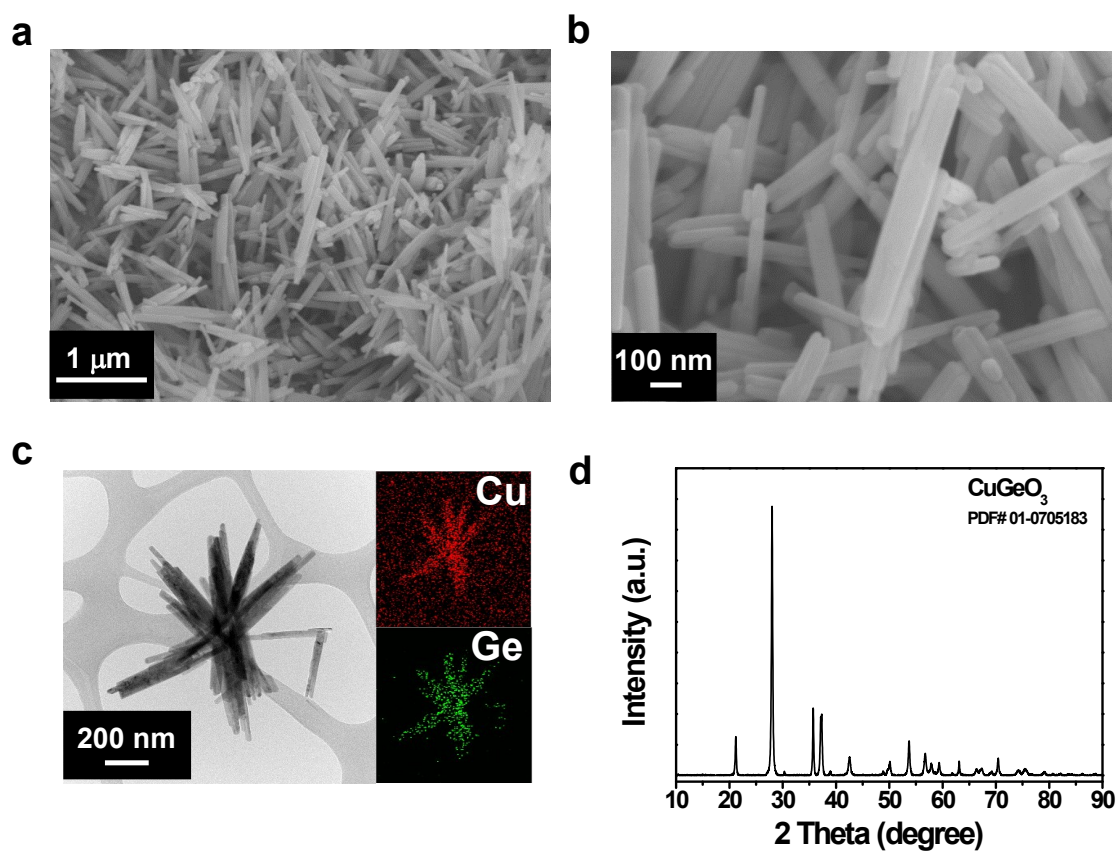

**Fig. S1** Characterization of as-synthesized  $\text{CuGeO}_3$  materials. (a) SEM image of  $\text{CuGeO}_3$ , (b) magnified SEM image of  $\text{CuGeO}_3$ , (c) TEM images and EDS mapping images (Cu and Ge elements) of as-prepared  $\text{CuGeO}_3$  nanorods, (d) XRD pattern of  $\text{CuGeO}_3$  materials.

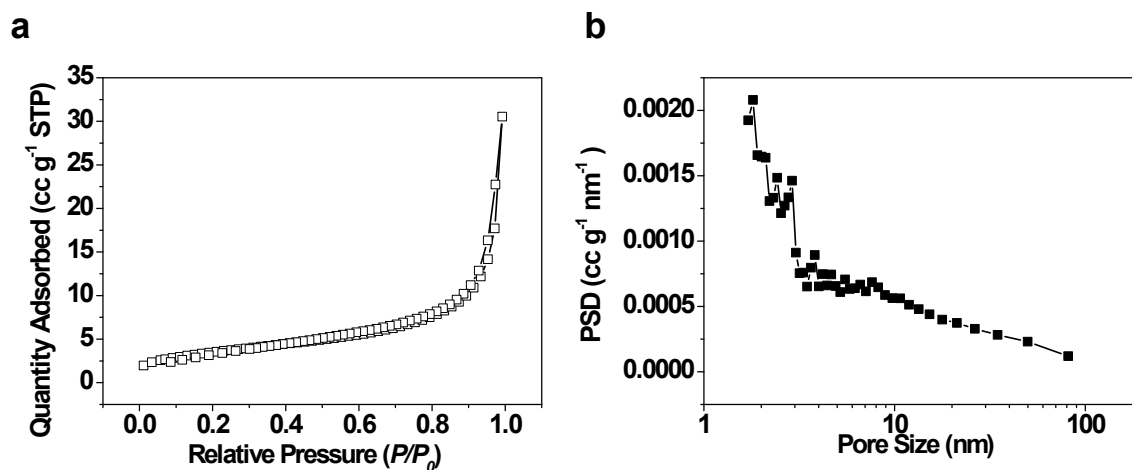

**Fig. S2** Characterization of Cu-Ge-600 materials. (a) Nitrogen adsorption-desorption plots and (b) pore-size distribution plots of the Cu-Ge-600 particles obtained by the thermal reduction process at 600 °C.

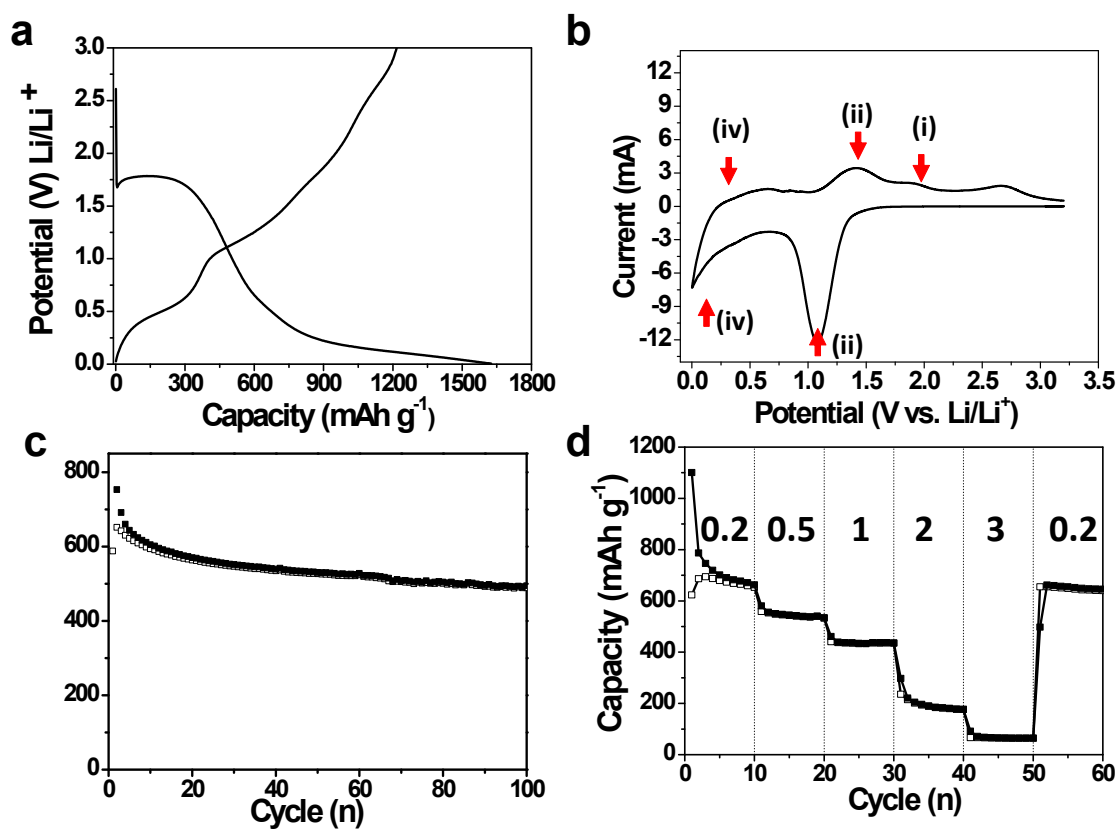

**Fig. S3** Electrochemical performances of as-synthesized  $\text{CuGeO}_3$  electrodes. (a) The first cycle voltage profile of  $\text{CuGeO}_3$  electrode obtained at a rate of C/20, (b) cyclic voltammogram of  $\text{CuGeO}_3$  electrode tested at a scan rate of  $1\text{mV/s}$ , (c) cycle performances of  $\text{CuGeO}_3$  electrode tested at rates of C/5, (d) rate capability of the electrode tested at various c-rate (same charge and discharge rates).

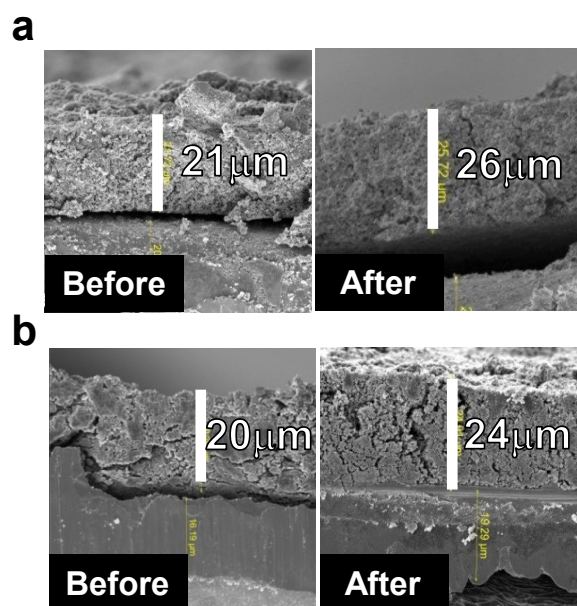

**Fig. S4** Cross-sectional SEM images of two Cu-Ge composite electrodes before electrochemical test and after 100 cycles. (a) Cu-Ge-700, and (b) Cu-Ge-900 electrodes.

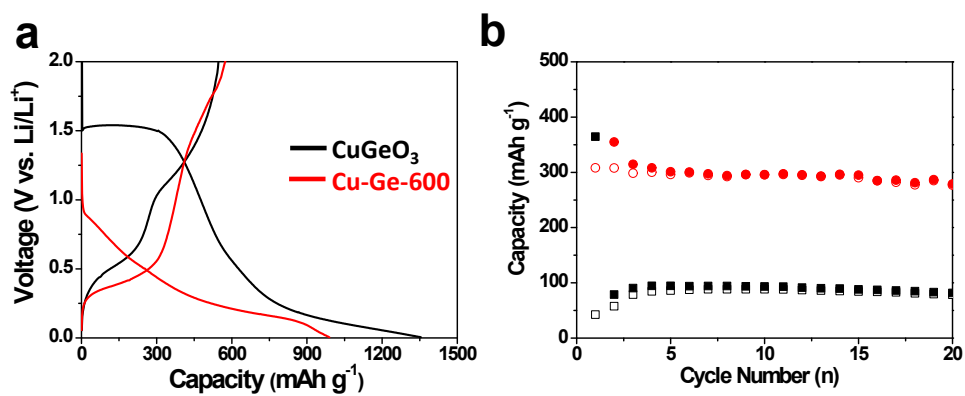

**Fig. S5** Electrochemical performances of CuGeO<sub>3</sub> (black) and Cu-Ge-600 (red) anodes without any conducting agent such as carbon nano powders. (a) The first cycle voltage profile of at a rate of C/20, (b) cycle performances of two electrodes tested at rates of C/5.
